# Supplementary material for: Physicochemical Variation of the Main Components during Wild Pretreatment Process Based on the Concept of the Whole Utilization of Bamboo
Source: MDPI journal article supplement (doi:10.3390/en14216857), 2021-10-20
Supplement: s1 [file s1]

## Supporting Materials

**Table S1.** Summary of pretreatment conditions for separating main components of Moso bamboo.

| Condition      |            |          | Yield (%) |
|----------------|------------|----------|-----------|
| Samples        | NaOH (wt%) | EtOH (%) |           |
| P <sub>1</sub> | 1          | 60       | 73.4      |
| P <sub>2</sub> | 2          | 60       | 78.5      |
| P <sub>3</sub> | 4          | 20       | 91.9      |
| P <sub>4</sub> | 4          | 60       | 83.3      |
| P <sub>5</sub> | 4          | 80       | 88.9      |

**Table S2.** Typical FTIR absorbance of functional groups in cellulose, hemicellulose and lignin.

| Label    | Wavenumber (cm <sup>-1</sup> ) | Functional groups                    |
|----------|--------------------------------|--------------------------------------|
| <b>C</b> | 3440                           | Hydroxyl O-H                         |
|          | 2880                           | C-H single bond                      |
|          | 1640                           | Absorbed O-H                         |
|          | 1440                           | Flexural vibration of C-H bond       |
|          | 1120                           | C-OH bending                         |
|          | 910                            | $\sigma$ C-H                         |
| <b>H</b> | 3433                           | Hydroxyl O-H                         |
|          | 2922                           | C-H single bond                      |
|          | 1614                           | Associated hydroxyl O-H              |
|          | 1520                           | Expansion vibration of benzene ring  |
|          | 1400-1200                      | Aliphatic C-H deformation vibrations |
|          | 1200-1000                      | C-OH bending                         |
|          | 750                            | phenolic hydroxyl O-H                |
| <b>L</b> | 1720                           | C=O                                  |
|          | 1640                           | Aromatic hydrocarbon                 |
|          | 1516                           | Expansion vibration of benzene ring  |
|          | 1240                           | C-O-C                                |
|          | 796                            | Phenolic hydroxyl O-H                |
